# Supplementary material
Source: Research Square preprint supplement (doi:10.21203/rs.3.rs-9043433/v1)
Supplement: Supplementary file 1 [file 67b8b67f5524832a06f9d51e.docx]

**Figure S.1.** All bridge centrality plots.

**Figure S.2**. Nonparametric bootstrapped confidence intervals of estimated edges in network. The red line represents the estimated edge, while the shaded area indicates the 95% bootstrap confidence interval.

**Figure S.3.** Stability analysis of expected influence centrality.

**Figure S.4.** Expected influence centrality difference test. Grey boxes indicate no significant differences, whereas black boxes indicate statistically significant differences (*p* < 0.05).
